# Supplementary material for: Tilapia lake virus downplays innate immune responses during early stage of infection in Nile tilapia (Oreochromis niloticus)
Source: PubMed Central journal article supplement (PMC7684318; doi:10.1038/s41598-020-73781-y), 2020-11-23
Supplement: 41598_2020_73781_MOESM1_ESM.pdf [file 41598_2020_73781_MOESM1_ESM.pdf]

# Tilapia lake virus downplays innate immune responses during early stage of infection in Nile tilapia (*Oreochromis niloticus*)

Kizito K Mugimba<sup>1,2</sup>, Mustapha Lamkhannat<sup>1</sup>, Saurabh Dubey<sup>1</sup>, Stephen Mutoloki<sup>1</sup>, Hetron M. Munang'andu<sup>1</sup> and Øystein Evensen<sup>1</sup>

1- Norwegian University of Life Sciences, Faculty of Veterinary Medicine, Department of Basic Sciences and Aquatic Medicine, PO Box 369, 0102 Oslo, Norway

2- Makerere University, College of Veterinary Medicine Animal resources and Biosecurity, Department of Biotechnical and Diagnostic Sciences. P.O Box 7062, Kampala, Uganda.

Correspondence: [oystein.evensen@nmbu.no](mailto:oystein.evensen@nmbu.no)

Supplementary Figures 1 - 4.

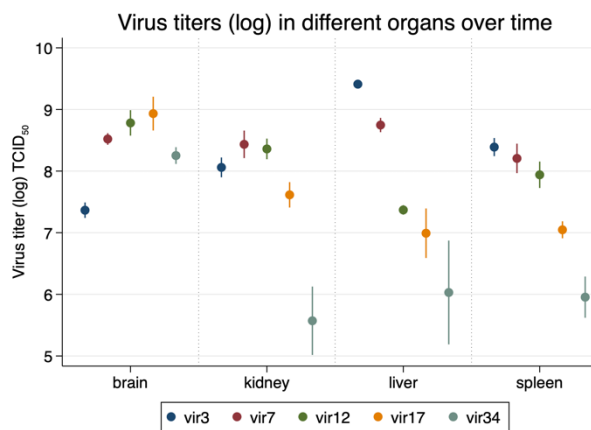

Supplementary Fig. 1. Virus titers in different organs over the course of the challenge period.

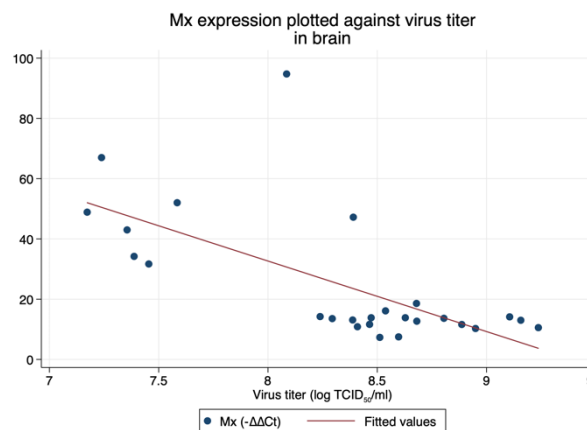

Supplementary Fig. 2. Mx expression plotted against virus titer.

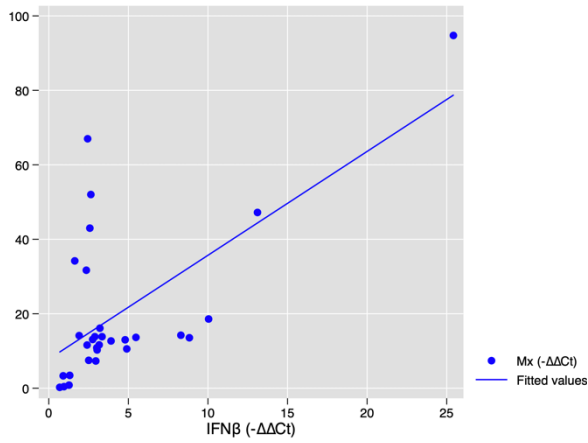

Supplementary Fig. 3. IFN- $\beta$  plotted against Mx for the brain over the course of the challenge period,  $r^2=0.65$ .

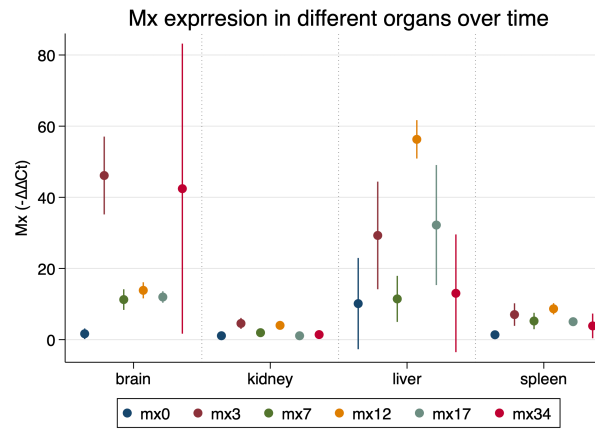

Supplementary Fig. 4. Mx expression in different organs over the course of the challenge period. Expression is significantly higher in brain compared to kidney and spleen at all timepoints,  $p \leq 0.025$ .
